# Supplementary material for: F-Box Family Genes, LTSF1 and LTSF2, Regulate Low-Temperature Stress Tolerance in Pepper (Capsicum chinense)
Source: MDPI journal article supplement (doi:10.3390/plants9091186), 2020-09-11
Supplement: s1 [file s1]

**Table S2.** qPCR primers used in this study.

| Primer Name       | Sequence                     | Reference     |
|-------------------|------------------------------|---------------|
| <i>NtGST-F</i>    | AGCACCCCTTACCTTTCCCTC        | [52]          |
| <i>NtGST-R</i>    | GCAGCTTCTCCAATCCCTTAAC       |               |
| <i>NtCAT-F</i>    | CACAGCCACGCTACTCAAGAC        | [52]          |
| <i>NtCAT-R</i>    | CCACCCACCGACGAATAAAG         |               |
| <i>NbAPX-F</i>    | GGAGTGGTTGCTGTTGAAGTC        | [52]          |
| <i>NbAPX-R</i>    | GGAGAGCCTTGTCTGATGG          |               |
| <i>NtSOD-F</i>    | CAACTCCACGGCTTCCAGAC         | [52]          |
| <i>NtSOD-R</i>    | TGGGTCCTGATTAGCAGTGGT        |               |
| <i>NbActin-F</i>  | CCAGGTATTGCTGATAGAATGAG      | [52]          |
| <i>NbActin-R</i>  | CTGAGGGAAGCCAAGATAGAG        |               |
| <i>LTSF1-RT-F</i> | TCCAGATGGTGAGCTGCTACTATTTT   | Present study |
| <i>LTSF1-RT-R</i> | TGGATGTCTGGAATGTAAAACAGCTAAC |               |
| <i>LTSF2-RT-F</i> | TCCAGATGGTGGGCTGCTACTATATG   | Present study |
| <i>LTSF2-RT-R</i> | TGAATGTCTGGAATGTAAAACAGCTAGG |               |
| <i>CaActin-F</i>  | AGGAATGGTTAAGGCTGGATTT       | Present study |
| <i>CaActin-R</i>  | TCTTCTCCATATCGTCCCAGTT       |               |
| <i>NbActin-F</i>  | CCAGGTATTGCTGATAGAATGAG      | Present study |
| <i>NbActin-R</i>  | CTGAGGGAAGCCAAGATAGAG        |               |

## Reference

52. Li, Y.; Zhang, L.; Wang, X.; Zhang, W.; Hao, L.; Chu, X.; Guo, X. Cotton GhMPK6a negatively regulates osmotic tolerance and bacterial infection in transgenic *Nicotiana benthamiana*, and plays a pivotal role in development. *FEBS J.* **2013**, *280*, 5128-5144.
