# Supplementary material for: F-Box Family Genes, LTSF1 and LTSF2, Regulate Low-Temperature Stress Tolerance in Pepper (Capsicum chinense)
Source: MDPI journal article supplement (doi:10.3390/plants9091186), 2020-09-11
Supplement: s1 [file s1]

**Table S1.** *LTSF1* and *LTSF2* cDNA sequences.

|                                                                                                                                                                                                                                                                                                                                                                                                                                                                                                                                                                                                                                                                                                                                                                                                                                                                                                                                                                                                                                                                                                                                                                                                                                                                                                                                                                                                                                                                                                                                                                                  |
|----------------------------------------------------------------------------------------------------------------------------------------------------------------------------------------------------------------------------------------------------------------------------------------------------------------------------------------------------------------------------------------------------------------------------------------------------------------------------------------------------------------------------------------------------------------------------------------------------------------------------------------------------------------------------------------------------------------------------------------------------------------------------------------------------------------------------------------------------------------------------------------------------------------------------------------------------------------------------------------------------------------------------------------------------------------------------------------------------------------------------------------------------------------------------------------------------------------------------------------------------------------------------------------------------------------------------------------------------------------------------------------------------------------------------------------------------------------------------------------------------------------------------------------------------------------------------------|
| <p>&gt;No.3341-LTSF1</p> <p>ATGCCTGTCAAAGTAGCAAAGAGAAAGCATTTCCTCAAAGTAAAATGGATTTTCTCAGTCAGAGCAGCAAATGGAGAAGCAGAGAATCCCCCTAT<br/> CATTGAGATCCAACCATATAACGAAGCAAAAAAGGTAGATCTTGAATCGAGAAAAAAGGCAAATATTTTGAAATGCCAACATCAGGGGAAGAAG<br/> AAGCTGTTGAAGAAGAAATCAGTACCTCACGGTCAAATTCGCAAGGGGAAGAGAGTCGTGAAGAAGATAGATTATGATCAGCAGGCAATTCATTT<br/> CCAAGAGCAAATACTTGTGGATATCCTCAGCAGGTTACCCTTGCGCTCTCTTCTTCGCTTCAAATGTGTCTCCAAAACTTGGGAGGCATTAATATCA<br/> GATCCTTATTTTCATAAGATGATAATGAAGAAGCAGCGTCAGAGTCCTGATTCAACTTCCAAAAAGCTTCTTATTCGCAAAATGTTTCAGTGACACTG<br/> CTCCCTCAAGGTTTAAATTCTATTCTTCTTCTTATCCACTTTTGAGGATGTACAACAACCTCGATCCCCCTTTAACCCACTATGTGGATCGTTATCACA<br/> TCTTTTCTTCTTTCGACGGCTTGGCTCTTCTTCTGCTGATACACAGCTTTTCTGTGGAACCCCTTAACAAGAGAAACCGCACTACTTCCCCATACAG<br/> AATTTGAGGCAATGTGCACTTGTTTCGTATTGGGATATGATGATGCCACTGATGGCTATAAGATCCTTAAATTGGACATGCGTCTACAAAAATCCAT<br/> GGAAATTCTCACGCTTAAAAACAAGGCTTTGGAGGAAAATTTGTAACCATCCAACCTGCCGTTTGCCCTACGACAGGACATGAAATGGAGATTCTTCC<br/> TCGCCCCAAGTAAAAATATTCCTATGGAGCCTTTGGTATGTGTACATGGAGCTTTTCATTGGCTTGGTGATTGAAAGTATTTGGAAAGTTTTATGTGG<br/> TTTCATTTAGTATTTCAAATGAGGTGTACGGAGACGTACCTTTGCTAGAGGAGATGGGGAAAAAGGTTAACTACCGCCCAGATTTTGGCCTTTTCATT<br/> ATTGGATGGAATGCTTTGCTATTATACTACTACTAATGATGGTTTCATTGGGTTCTTTTAAAGTTGTGGGCTATGAAAGACTATGGTGTCAAGGAATCTT<br/> GGATAGTATTGTGTACCTTACAATTCAATGGTCTTGTATAGCCAAACCGCGATATAGGTTTCCAGATGGTGAGCTGCTACTATTTTACCGGGGGA<br/> ATTCCACATCAATGTGGGTAGTTAGCTGTTTTACATTCCAGACATCCAAAGGAAAATTTGGATTTTGGCCTGAACGCGGAGGACCCTTTGAGAA<br/> AGGAATCATTTATAGAGAAAGCTTGATTTCTCCAAAATTAGTTATCTAA</p> |
| <p>&gt;sy2-LTSF1</p> <p>ATGCCTGTCAAAGTAGCAAAGAGAAAGCATTTCCTCAAAGTAAAATGGATTTTCTCAGTCAGAGCAGCAAATGGAGAAGCAGAGAATCCCCCTAT<br/> CATTGAGATCCAACCATATAACGAAGCAAAAAAGGTAGATCTTGAATCGAGAAAAAAGGCAAATATTTTGAAATGCCAACATCAGGGGAAGAAG<br/> AAGCTGTTGAAGAAGAAATCAGTACCTCACGGTCAAATTCGCAAGGGGAAGAGAGTCGTGAAGAAGATAGATTATGATCAGCAGGCAATTCATTT<br/> CCAAGAGCAAATACTTGTGGATATCCTCAGCAGGTTACCCTTGCGCTCTCTTCTTCGCTTCAAATGTGTCTCCAAAACTTGGGAGGCATTAATATCA<br/> GATCCTTATTTTCATAAGATGATAATGAAGAAGCAGCGTCAGAGTCCTGATTCAACTTCCAAAAAGCTTCTTATTCGCAAAATGTTTCAGTGACACTG<br/> CTCCCTCAAGGTTTAAATTCTATTCTTCTTCTTATCCACTTTTGAGGATGTACAACAACCTCGATCCCCCTTTAACCCACTATGTGGATCGTTATCACA<br/> TCTTTTCTTCTTTCGACGGCTTGGCTCTTCTTCTGCTGATACACAGCTTTTCTGTGGAACCCCTTAACAAGAGAAACCGCACTACTTCCCCATACAG<br/> AATTTGAGGCAATGGGCACTTGTTTCGTATTGGGATATGATGATGCCACTGATGGCTATAAGATCCTTAAATTGGACATGCGTCTACAAAAATCCAT<br/> GGAAATTCTCACGCTTAAAAACAAGGCTTTGGAGGAAAATTTGTAACCATCCAACCTGCCGTTTGCCCTACGACAGGACATGAAATGGAGATTCTTCC<br/> TCGCCCCAAGTAAAAATATTCCTATGGAGCCTTTGGTATGTGTACATGGAGCTTTTCATTGGCTTGGTGATTGGAAGTATTTGGAAAGTTTTATGTGG<br/> TTTCATTTAGTATTTCAAATGAGGTGTACGGAGACGTACCTTTGCTAGAGGAGATGGGGAAAAAGGTTAACTACCGCCCAGATTTTGGCCTTTTCATT<br/> ATTGGATGGAATGCTTTGCTATTATACTACTACTAATGATGGTTTCATTGGGTTCTTTTAAAGTTGTGGGCTATGAAAGACTATGGTGTCAAGGAATCTT<br/> GGATAGTATTGTGTACCTTACAATTCAATGGTCTTGTATAGCCAAACCGCGATATAGGTTTCCAGATGGTGAGCTGCTACTATTTTACCGGGGGA<br/> ATTCCACATCAATGTGGGTAGTTAGCTGTTTTACATTCCAGACATCCAAAGGAAAATTTGGATTTTGGCCTGAACGCGGAGGACCCTTTGAGAA<br/> AGGAATCATTTATAGAGAAAGCTTGATTTCTCCAAAATTAGTTATCTAA</p>     |
| <p>&gt;No.3341-LTSF2</p> <p>ATGCCTGTCAAAGTAGCAAAGAGAAAGCATTTCCTCAAAGTAAAATGGATTTTCTCAGTCAGAGCAGCAAATGGAGAAGCAGAGAATCCCCCTAT<br/> CATTGAGATCCAACCATATAACGAAGCAAAAAAGGTAGATCTTGAATCGAGAAAAAAGGCAAATATTTTGAAATGCCAACACCAGGGGAAGAAG<br/> AAGCTGTTGAAGAAGAAATCAGTACCTCACGGTCAAATTCGCAAGGGGAAGAGAGTCGTGAAGAAGATAGATTATGATCAGCAGGCAATTCATTT</p>                                                                                                                                                                                                                                                                                                                                                                                                                                                                                                                                                                                                                                                                                                                                                                                                                                                                                                                                                                                                                                                                                                                                                                                                                                         |

CCAAGAGCAAATACTTGTGGATATCCTCAGCAGGTTACCCTTGCGCTCTCTTCTTCGCTTCAAATGTGCCTCCAAAACCTGGGAGGCATTAATATCA  
GATCCTTATTTTCATAAGATGATAATGAAGAAGCAGCGTCAGAGTCCTGATTCAACTTCCCAAAAGCTTCTTATTCGCAAAATGTTTCAGTGACACTG  
CTCCCTCAAGGTTTAAATTCTATTCTTCTTCTTTATCCACTTTTGAGGATGTACAACAACCTCGATCCCCCTTTAACCCACTATGTGGATCGTTATCACA  
TCTTTTCTTCTTTCGACGGCTTGGCTCTTCTTGCTGCTGATACACAGCTTTTCTTGTTGGAACCCCTTGACAAGAGAAACCGCACTACTTCCCCATACAG  
AATTTGAGGCAATGTGCACTTGTTCGTATTGGGATATGATGATGCCACTGATGGCTATAAGATCCTTAAATTTGTCATGCGTCTACAAAGTTCCATG  
GAAATTCTCACGCTTAAACAGGGCTTTGGAGGAAAATTTGTAACATATCCAACCTGCCGTTTGCCCTACGACAGGACATGAAATGGAAATTATTCCT  
CGCCCAAGTAAAAATATTCCTAGGGAGCCTTTGGTATGTGTACATGGAGCTTTTCATTGGCTTGGTGATTGAAAGGTATCAGGAAAGTTTATGTGG  
TTTCATTTAGTATTTCAAATGAGGTGTACGGAGACGTACCTTTGCTAGAGGAGATGGGGAAAAAGGTTAACTACCGCCCAGATTTTGGCCTTTTCATT  
ATTGGATGGAATGCTTTGCTATTATACTACTACTAATGATGGTTTCATTGGGTTCTTTTAAAGTTGTGGGCTATGAAAGACTATGGTGTCAAGGAATCTT  
GGATAGTATTGTGTACCTTACAATTCAATGGTCTTGTATAGCCAAACCACGATATAGGTTTCCAGATGGTGAGCTGCTACTATTTTACCGGGGGA  
ATTCCACATCAATGTGGGGTAGTTAGCTGTTTTACATTCCAGACATCCAAAGGAAAATTTGGATTTTGGCCTGAACGCGGAGGAACCTTTGAGAA  
AGGAATCATTTATAGAGAAAGCTTGATTTCTCCAAAATTAGTTATCTAG

>sy2-LTSF2

ATGCCTGTCAAAGTAGCAAAGAGAAAGCATTTCCAAACCTGAAAATGGATTTTCTCAGTCAGAGCAGCAAATGGAGAAGCAGAGAATCCCCCTAT  
CATTTCAGATCCAACCATATAACGAAGCAAAAAAGGTAGATCTTGAATCGAGAAAAAAGGCAAAATATTTGAAATGCCAACAGCAGGGGAAGAAG  
AAGCTGTTGAAGAAGAAATCAGTACCTCACGGTCAAATTCGCAAGGGGAAGAGAGTCGTGAAGAAGATAGATTATGATCAGCAGGCAATTCATTT  
CCAAGAGCAAATACTTGTGGATATCCTCAGCAGGTTACCCTTGCGCTCTCTTCTTCGCTTCAAATGTGCCTCCAAAACCTGGGAGGCATTAATATCA  
GATCCTTATTTTCATAAGATGATAATGAAGAAGCAGCGTCAGAGTCCTGATTCAACTTCCCAAAAGCTTCTTATTCGCAAAATGTTTCAGTGACACTG  
CTCCCTCAAGGTTTAAATTCTATTCTTCTTCTTTATCCACTTTTGAGGATGTACAACAACCTCGATCCCCCTTTAACCCACTATGTGGATCGTTATCACA  
TCTTTTCTTCTTTCGACGGCTTGGCTCTTCTTGCTGCTGATACACAGCTTTTCTTGTTGGAACCCCTTGACAAGAGAAACCGCACTACTTCCCCATACAG  
AATTTGAGGCAATGTGCACTTGTTCGTATTGGGATATGATGATGCCACTGATGGCTATAAGATCCTTAAATTTGTCATGCGTCTACAAAAATCCAT  
GGAAATTCTCACGCTTAAACAGGGCTTTGGAGGAAAATTTGTAACATATCCAACCTGCCGTTTGCCCTACGACAGGACATGAAATGGAAATTATTCC  
TCGCCCAAGTAAAAATATTCCTAGGGAGCCTTTGGTATGTGTACATGGAGCTTTTCATTGGCTTGGTGATTGAAAGGTATCAGGAAAGTTTATGTG  
GTTTCATTTAGTATTTCAAATGAGGTGTACGGAGACGTACCTTTGCTAGAGGAGATGGGGAAAAAGGTTAACTACCGCCCAGATTTTGGCCTTTTCAT  
TATTGGATGGAATGCTTTGCTATTATACTACTACTAATGATGGTTTCATTGGGTTCTTTTAAAGTTGTGGGCTATGAAAGACTATGGTGTCAAGGAATCT  
TGGATAGTATTGTGTACCTTACAATTCAATGGTCTTGTATAGCCAAACCACGATATAGGTTTCCAGATGGTGAGCTGCTACTATTTTACCGGGGG  
AATTCCACATCAATGTGGGGTAGTTAGCTGTTTTACATTCCAGACATCCAAAGGAAAATTTGGATTTTGGCCTGAACGCGGAGGAACCTTTGAGA  
AAGGAATCATTTATAGAGAAAGCTTGATTTCTCCAAAATTAGTTATCTAG
